# Supplementary material for: Suppressed serological vitamin A in patients with liver cirrhosis is associated with impaired liver function and clinical detoriation
Source: PubMed Central journal article supplement — Eur J Gastroenterol Hepatol. 2022 Jul 21;34(10):1053–9. doi: 10.1097/MEG.0000000000002418 (PMC9439687; doi:10.1097/meg.0000000000002418), 2022-07-21
Supplement: ejgh-34-1053-s001.pdf [file ejgh-34-1053-s001.pdf]

**Supplementary table 1:** Demographics and clinical characteristics of the validation cohort comparing patients with suppressed vitamin a and normal vitamin a.

| Parameter                                       | Total Cohort<br>(N = 44) | Suppressed<br>Vitamin A<br>(N = 21) | Normal Vitamin A<br>(N = 23) | P Value |
|-------------------------------------------------|--------------------------|-------------------------------------|------------------------------|---------|
| Age (years)<br>MEDIAN; IQR                      | 62<br>(53; 67)           | 59<br>(52; 64)                      | 64<br>(54; 69)               | 0.16    |
| CHILD PUGH<br>* Stadium A<br>(N; %)             | 15<br>(34%)              | 6<br>(29%)                          | 9<br>(39%)                   | 0.19    |
| * Stadium B<br>(N; %)                           | 16<br>(36%)              | 7<br>(33%)                          | 9<br>(39%)                   |         |
| * Stadium C<br>(N; %)                           | 12<br>(27%)              | 8<br>(38%)                          | 4<br>(17%)                   |         |
| MELD<br>MEDIAN; IQR                             | 13<br>(9; 18)            | 14<br>(10; 18)                      | 12<br>(7; 17)                | 0.32    |
| Hemoglobin (g/dl)<br>MEDIAN; IQR                | 12.6<br>(10.5; 14)       | 11.2<br>(8.5; 13.4)                 | 12.7<br>(11; 14)             | 0.1     |
| Platelets (/nl)<br>MEDIAN; IQR                  | 139<br>(92; 211)         | 103<br>(84; 170)                    | 175<br>(124; 244)            | 0.01    |
| White blood cells<br>(/nl)<br>MEDIAN; IQR       | 7.3<br>(5.3; 10)         | 6.41<br>(4.3; 10.5)                 | 7.66<br>(6; 10)              | 0.44    |
| ALT (U/l)<br>MEDIAN; IQR                        | 33<br>(22; 64)           | 29.5<br>(25; 53)                    | 45<br>(21; 77)               | 0.18    |
| AST (U/l)<br>MEDIAN; IQR                        | 58<br>(33; 130)          | 65<br>(44; 112)                     | 57<br>(31; 137)              | 0.7     |
| yGT (U/l)<br>MEDIAN; IQR                        | 155<br>(61; 242)         | 170<br>(68; 244)                    | 151<br>(53; 236)             | 0.5     |
| Alkaline<br>Phosphatase<br>(U/l)<br>MEDIAN; IQR | 133<br>(95; 168)         | 153<br>(120; 175)                   | 109<br>(82; 167)             | 0.5     |
| Bilirubin (mg/dl)<br>MEDIAN; IQR                | 2.2<br>(1.15; 4)         | 3.37<br>(1.47; 4.42)                | 1.42<br>(1; 3)               | 0.6     |

|                                          |                     |                      |                      |         |
|------------------------------------------|---------------------|----------------------|----------------------|---------|
| Albumin (g/l)<br>MEDIAN; IQR             | 32<br>(28; 38)      | 29<br>(25; 32)       | 38<br>(33; 43)       | < 0.001 |
| INR<br>MEDIAN; IQR                       | 1.3<br>(1.13; 1.47) | 1.41<br>(1.16; 1.57) | 1.21<br>(1; 1.3)     | 0.05    |
| Creatinine (mg/dl)<br>MEDIAN; IQR        | 0.9<br>(0.71; 1.23) | 0.88<br>(0.69; 1.21) | 0.96<br>(0.76; 1.54) | 0.3     |
| CRP (mg/dl)<br>MEDIAN; IQR               | 10<br>(3.5; 19)     | 9<br>(3.1; 16.1)     | 16<br>(4.8; 40.1)    | 0.48    |
| Ascites<br>(N; %)                        | 29<br>(66%)         | 16<br>(76%)          | 13<br>(57%)          | 0.18    |
| Hepatic<br>Encephalopathy<br>(N; %)      | 8<br>(18%)          | 6<br>(29%)           | 2<br>(9%)            | 0.03    |
| Hepatorenal<br>Syndrome<br>(N; %)        | 5<br>(11%)          | 2<br>(10%)           | 3<br>(13%)           | 0.72    |
| Esophageal<br>varices bleeding<br>(N; %) | 4<br>(9%)           | 4<br>(19%)           | 0<br>(0%)            | 0.03    |

Data are expressed as medians and frequencies and percentages.

Abbreviations: IQR: interquartile range; WBC: white blood cells; MELD: model of end-stage liver disease; INR: international normalized ratio
